# Supplementary material for: Response Surface Methodology (RSM) Mediated Optimization of Medium Components for Mycelial Growth and Metabolites Production of Streptomyces alfalfae XN-04
Source: MDPI journal article supplement (doi:10.3390/microorganisms10091854), 2022-09-16
Supplement: s1 [file s1]

## Supplementary Material

### 1.1 Supplementary Figures

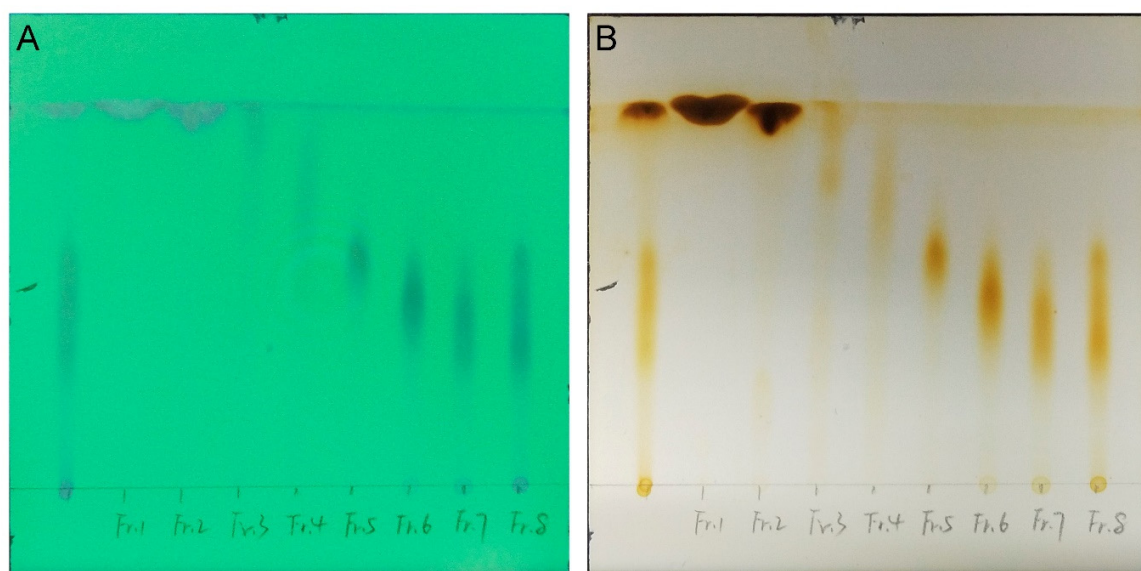

**Supplementary Figure S1.** Thin layer chromatography (TLC) analysis of the MeOH extract from *S. alfalfae* XN-04. Frs.1-8 were purified by silica gel column chromatography. (A) Under ultraviolet light of 254 nm (UV<sub>254</sub>); (B) With iodine.

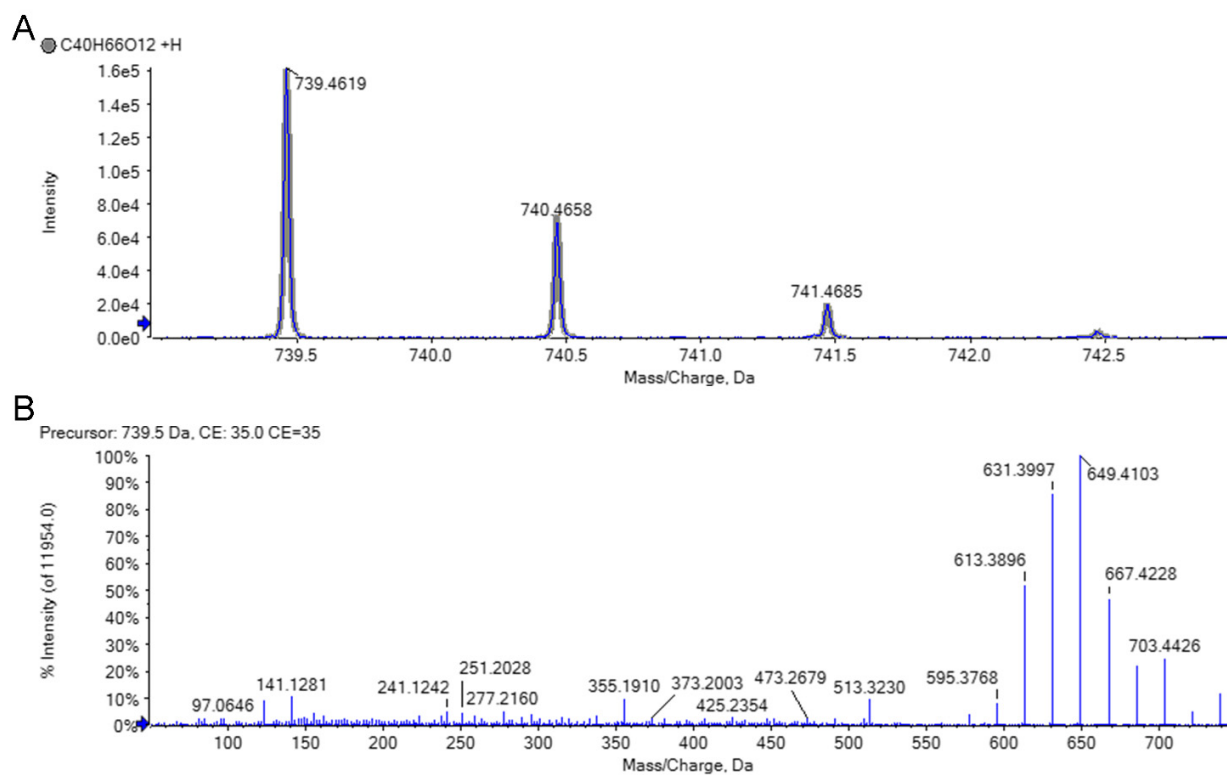

**Supplementary Figure S2.** Mass spectrum of the compound exhibiting antifungal activity isolated from *S. alfalfae* XN-04. (A) Mass spectrum of the peak at m/z 739.4619. (B) Tandem mass spectrometry (MS/MS) spectrum of the peak at m/z 739.4619.

1.2    **Supplementary Tables**

**Table S1.** Ten fractions purified by silica gel column chromatography.

| Fractions | Weight (mg) | Inhibition radius (mm) |
|-----------|-------------|------------------------|
| Fr.1      | 1174        | 0                      |
| Fr.2      | 5631        | 0                      |
| Fr.3      | 110         | 0                      |
| Fr.4      | 176         | 1                      |
| Fr.5      | 672         | 14                     |
| Fr.6      | 755         | 10                     |
| Fr.7      | 459         | 10                     |
| Fr.8      | 860         | 12                     |
| Fr.9      | 165         | 3                      |
| Fr.10     | 1028        | 0                      |

**Table S2.** <sup>1</sup>H and <sup>13</sup>C NMR data of component 1 (600 MHz).

| Position | δ C                  | δ H                       |
|----------|----------------------|---------------------------|
| 1        | 170.1 C              | — —                       |
| 2        | 127.5 C              | — —                       |
| 3        | 140.6 CH             | 7.26 (1H, dd, 11.1, 1.3)  |
| 4        | 128.3 CH             | 6.60 (1H, dd, 14.6, 11.1) |
| 5        | 141.8 CH             | 6.66 (1H, dd, 14.6, 10.5) |
| 6        | 133.2 CH             | 6.41 (1H, dd, 14.8, 10.5) |
| 7        | 138.5 CH             | 6.48 (1H, dd, 14.8, 10.6) |
| 8        | 132.0 CH             | 6.25 (1H, dd, 14.8, 10.6) |
| 9        | 137.0 CH             | 6.36 (1H, dd, 14.8, 10.6) |
| 10       | 133.5 CH             | 6.19 (1H, dd, 14.8, 10.6) |
| 11       | 135.0 CH             | 5.83 (1H, m)              |
| 12       | 40.5 CH              | 2.40 (1H, m)              |
|          |                      | 2.22 (1H, m)              |
| 13       | 69.0 CH              | 4.03 (1H, overlap)        |
| 14       | 41.9 CH <sub>2</sub> | 1.91 (1H, m)              |
|          |                      | 1.15 (1H, m)              |
| 15       | 65.1 CH              | 4.06 (1H, overlap)        |
| 16       | 45.6 CH <sub>2</sub> | 1.97 (1H, m)              |
|          |                      | 1.24 (1H, m)              |
| 17       | 98.9 C               | — —                       |
| 18       | 49.6 CH <sub>2</sub> | 1.80 (1H, overlap)        |
|          |                      | 1.69 (1H, overlap)        |
| 19       | 66.1 CH              | 4.31 (1H, overlap)        |
| 20       | 46.1 CH <sub>2</sub> | 1.69 (1H, overlap)        |
|          |                      | 1.45 (1H, overlap)        |
| 21       | 66.2 CH              | 4.06 (1H, overlap)        |
| 22       | 46.4 CH <sub>2</sub> | 1.51 (1H, overlap)        |
|          |                      | 1.39 (1H, overlap)        |
| 23       | 68.8 CH              | 3.96 (1H, overlap)        |
| 24       | 46.5 CH <sub>2</sub> | 1.53 (1H, overlap)        |
|          |                      | 1.45 (1H, overlap)        |
| 25       | 68.3 CH              | 4.03 (1H, overlap)        |
| 26       | 45.9 CH <sub>2</sub> | 1.45 (1H, overlap)        |
|          |                      | 1.39 (1H, overlap)        |
| 27       | 68.8 CH              | 3.96 (1H, overlap)        |
| 28       | 45.6 CH <sub>2</sub> | 1.51 (1H, overlap)        |
|          |                      | 1.37 (1H, overlap)        |
| 29       | 72.3 CH              | 3.96 (1H, overlap)        |
| 30       | 44.1 CH <sub>2</sub> | 1.51 (1H, overlap)        |
|          |                      | 1.37 (1H, overlap)        |
| 31       | 72.6 CH              | 3.62 (1H, m)              |
| 32       | 36.2 CH <sub>2</sub> | 1.57 (1H, overlap)        |
|          |                      | 1.45 (1H, overlap)        |
| 33       | 31.2 CH <sub>2</sub> | 1.21 (1H, m)              |
|          |                      | 1.08 (1H, overlap)        |
| 34       | 35.7 CH              | 1.80 (1H, overlap)        |
| 35       | 81.4 CH              | 4.81 (1H, dd, 10.0, 2.4)  |

|       |                      |                   |
|-------|----------------------|-------------------|
| 36    | 30.9 CH              | 1.97 (1H, m)      |
| 37    | 20.3 CH <sub>3</sub> | 0.88 (3H, t, 6.7) |
| 38    | 19.2 CH <sub>3</sub> | 0.93 (3H, t, 6.7) |
| 2-Me  | 12.9 CH <sub>3</sub> | 1.98 s            |
| 38-Me | 14.4 CH <sub>3</sub> | 0.96 (3H, t, 6.8) |
